# Supplementary material for: Searching for homozygous haplotype deficiency in Manech Tête Rousse dairy sheep revealed a nonsense variant in the MMUT gene affecting newborn lamb viability
Source: Springer Nature journal article supplement (doi:10.1186/s12711-024-00886-7), 2024-02-29
Supplement: MOESM2 [file 12711_2024_886_MOESM2_ESM.pdf]

**Additional file 2: Table S1.** EMBL-EBI accession numbers of the 100 whole-genome sequences used in the analysis.

| Breed                        | Number of animals | ENA run accession                                                                                                                                                                                                                                                                                                                                                                 | EBI project accession                  | Associated references |
|------------------------------|-------------------|-----------------------------------------------------------------------------------------------------------------------------------------------------------------------------------------------------------------------------------------------------------------------------------------------------------------------------------------------------------------------------------|----------------------------------------|-----------------------|
| Belclare                     | 2                 | SRR14934360; SRR14935129                                                                                                                                                                                                                                                                                                                                                          | PRJNA698548                            |                       |
| Berrichon du Cher            | 3                 | ERS1205899; ERS1205900; ERS1205901                                                                                                                                                                                                                                                                                                                                                | PRJEB14418                             | [49]                  |
| Cambridge                    | 7                 | ERR1419201; ERR1419202; ERR1419203; ERR1419204; ERR1419205; ERR1419206; ERR1419207                                                                                                                                                                                                                                                                                                | PRJEB14098                             |                       |
| Charollais                   | 1                 | SRR14934359                                                                                                                                                                                                                                                                                                                                                                       | PRJNA698548                            |                       |
| Lacaune (Dairy)              | 31                | ERR3276357; ERR3276358; ERR3276359; ERR3276360; ERR3276361; ERR3276362; ERR3276363; ERR3276364; ERR3276365; ERR3276366; ERR3276367; ERR3276368; ERR3276369; ERR3276370; ERR3276371; ERR3276372; ERR3276373; ERR3276374; ERR3276375; ERR3276376; ERR3276377; ERR3276378; ERR3276379; ERR7891349; ERR7891350; ERR7891351<br>ERR968423; ERR968424; ERR968425<br>SRR501850; SRR501851 | PRJEB32110<br>PRJEB9911<br>PRJNA160933 | [15,50]               |
| Lacaune (Meat)               | 3                 | ERR3276380; ERR3276381; ERR3276382                                                                                                                                                                                                                                                                                                                                                | PRJEB32110                             |                       |
| Manech Tête Rousse           | 22                | ERR3712282; ERR3712283; ERR3712284; ERR3712285*; ERR3712286; ERR3712287; ERR3712288; ERR3712289; ERR3712290; ERR3712291; ERR3712292; ERR3712293; ERR3712294; ERR3712295; ERR3712296; ERR3712297; ERR3712298; ERR3712299; ERR3712300; ERR3712301*; ERR7889920; ERR7889921                                                                                                          | PRJEB35682                             |                       |
| Martinik Blackbelly          | 1                 | ERR3255914                                                                                                                                                                                                                                                                                                                                                                        | PRJEB31930                             |                       |
| Noire du velay               | 2                 | ERR3828659; ERR3828660                                                                                                                                                                                                                                                                                                                                                            | PRJEB35553                             | [26]                  |
| Romane                       | 4                 | ERS1205902; ERS1205903; ERR2818429; ERR2818430                                                                                                                                                                                                                                                                                                                                    | PRJEB14418                             | [49]                  |
| Romane x Martinik Blackbelly | 13                | ERR3255915; ERR3255916; ERR3255917; ERR3255918; ERR3255919; ERR3988554; ERR3988555; ERR3988556; ERR3988557; ERR3988558; ERR3988559; ERR3988560; ERR3988561                                                                                                                                                                                                                        | PRJEB31930                             |                       |
| Romanov                      | 2                 | ERS1205904; ERS1205905                                                                                                                                                                                                                                                                                                                                                            | PRJEB14418                             | [49]                  |
| Suffolk                      | 2                 | SRR14934357; SRR14934358                                                                                                                                                                                                                                                                                                                                                          | PRJNA698548                            |                       |
| Texel                        | 2                 | SRR14934355; SRR14934356                                                                                                                                                                                                                                                                                                                                                          | PRJNA698548                            |                       |
| Vendéen                      | 5                 | ERR4236129; ERR4236130; ERR4236131<br>SRR14934353; SRR14934354                                                                                                                                                                                                                                                                                                                    | PRJEB37460<br>PRJNA698548              | [51]                  |
| <b>Total</b>                 | <b>100</b>        |                                                                                                                                                                                                                                                                                                                                                                                   |                                        |                       |

\* MTRDHH1 heterozygous carrier
