# Supplementary material for: Searching for homozygous haplotype deficiency in Manech Tête Rousse dairy sheep revealed a nonsense variant in the MMUT gene affecting newborn lamb viability
Source: Springer Nature journal article supplement (doi:10.1186/s12711-024-00886-7), 2024-02-29
Supplement: MOESM3 [file 12711_2024_886_MOESM3_ESM.pdf]

**Additional file 3: Table S2. List of PCR primer sequences**

| Application      | Gene symbol                         | Sequence (5'→3')                                                                                                                                                          | fragment size (pb) | Efficiency |
|------------------|-------------------------------------|---------------------------------------------------------------------------------------------------------------------------------------------------------------------------|--------------------|------------|
| Terra PCR        | <i>MMUT</i><br>NC_040271.1          | <b>F:</b> GCAGATTTTGGCAAAGAAAG<br><b>R:</b> ACCTTCAAGGCAGCATCATA                                                                                                          | 402                | -          |
| PACE PCR         | <i>MMUT</i><br>NC_040271.1          | <b>F1:</b> GAAGGTGACCAAGTTCATGCTAATCCCAGATTCTTCTTGAATAATGATTTG<br><b>F2:</b> GAAGGTGCGAGTCAACGGATTGAATCCCAGATTCTTCTTGAATAATGATTTA<br><b>R:</b> GTGAAAAGTGCTCGAATTGCCAGGAA | 81/82              | -          |
| Quantitative PCR | <i>MMUT</i><br><i>XM_004018875</i>  | <b>F:</b> GCTCATCAAGGAACTCAA<br><b>R:</b> TTCAATATCATCAAGCACTTG                                                                                                           | 169                | 1.80       |
|                  | <i>GAPDH</i><br>NM_001190390        | <b>F:</b> CGACTTCAACAGCGCACTC<br><b>R:</b> TGCTGTAGCCGAATTCATTG                                                                                                           | 113                | 1.90       |
|                  | <i>YWHAZ</i><br>NM_001267887        | <b>F:</b> ATTAAGTGAAGAGTCATACAA<br><b>R:</b> GTATCCGATGTCCACAAT                                                                                                           | 81                 | 2.00       |
|                  | <i>RPL19</i><br><i>XM_004012836</i> | <b>F:</b> AATGCCAATGCCAACTC<br><b>R:</b> CCCTTTCGCTACCTATACC                                                                                                              | 149                | 2.00       |
|                  | <i>SDHA</i><br><i>XM_027980212</i>  | <b>F:</b> GAATGGTCTGGAACACTG<br><b>R:</b> AGTAATCGTACTCGTCAAC                                                                                                             | 156                | 2.00       |

**F:** Forward primer, **R:** Reverse primer.
