# Supplementary material for: Searching for homozygous haplotype deficiency in Manech Tête Rousse dairy sheep revealed a nonsense variant in the MMUT gene affecting newborn lamb viability
Source: Springer Nature journal article supplement (doi:10.1186/s12711-024-00886-7), 2024-02-29

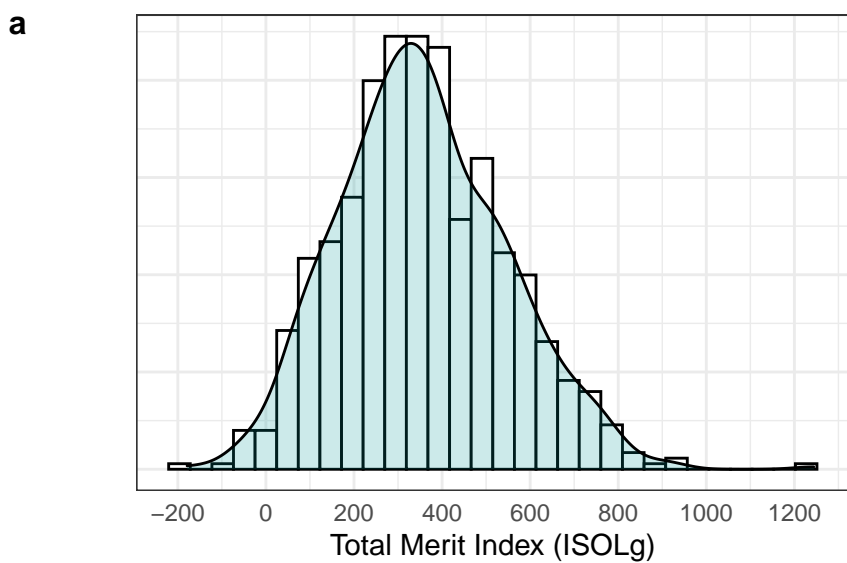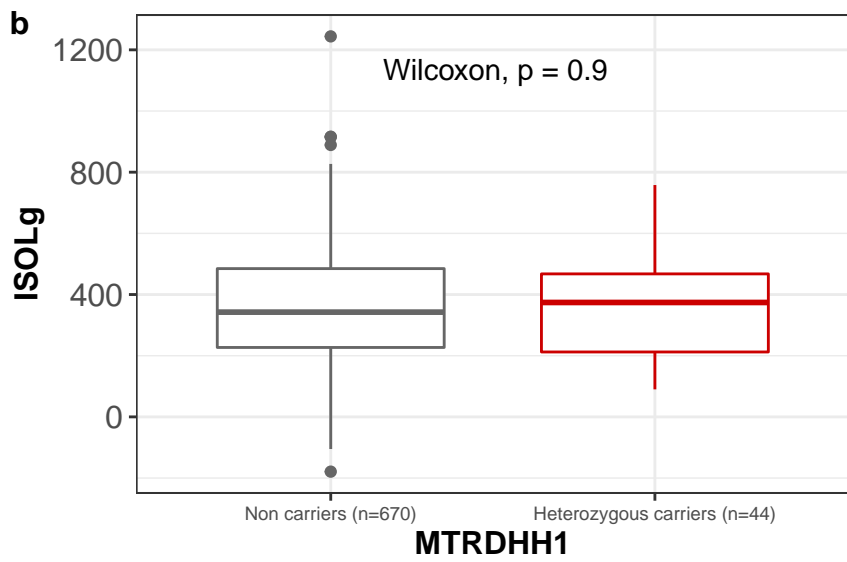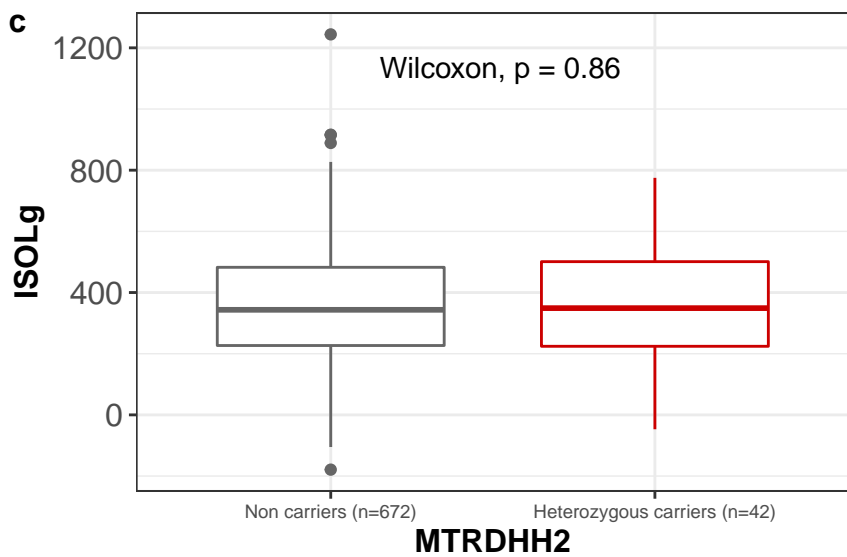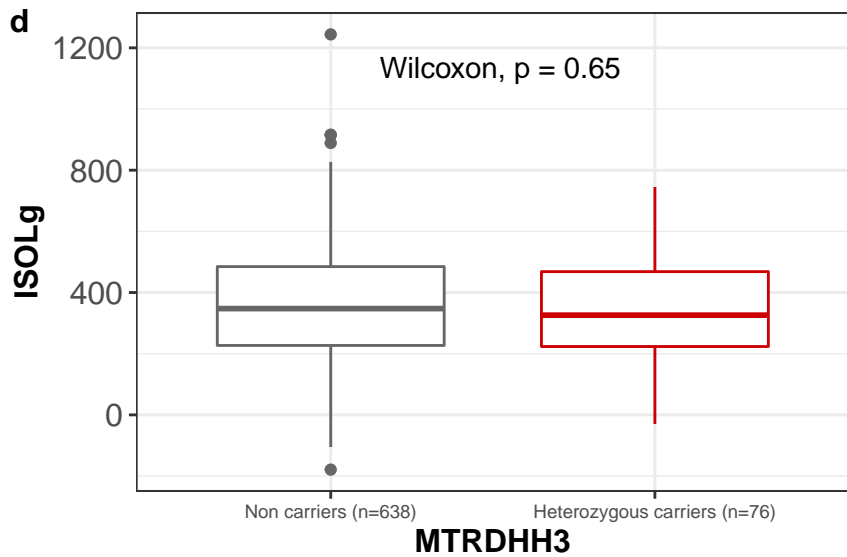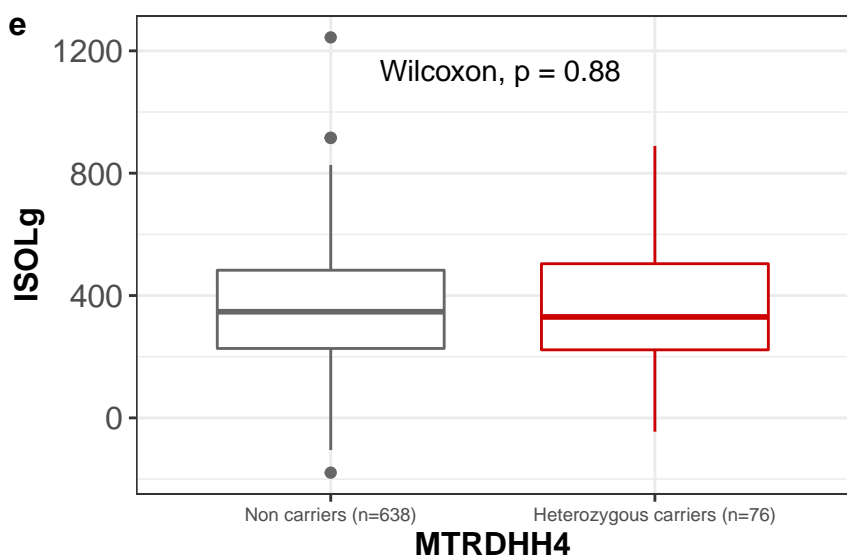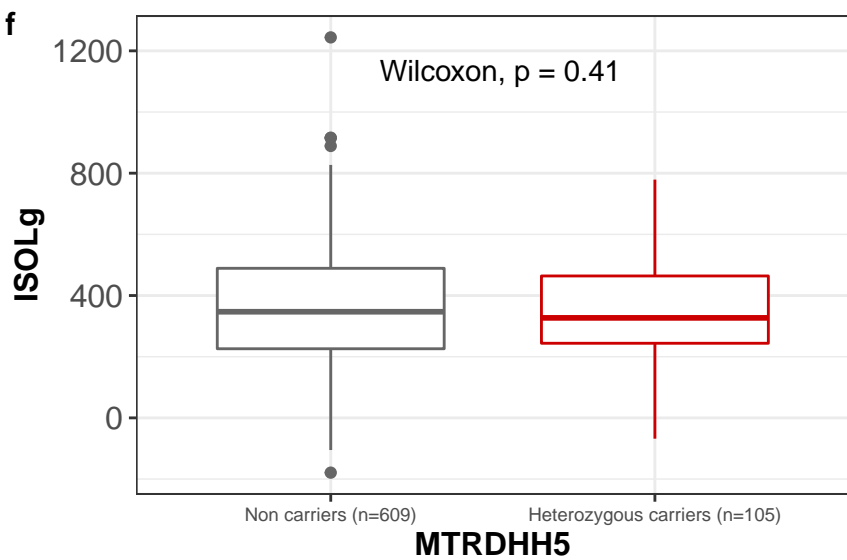

Supplement: MOESM7 [file 12711_2024_886_MOESM7_ESM.pdf]
