# Supplementary material for: Searching for homozygous haplotype deficiency in Manech Tête Rousse dairy sheep revealed a nonsense variant in the MMUT gene affecting newborn lamb viability
Source: Springer Nature journal article supplement (doi:10.1186/s12711-024-00886-7), 2024-02-29
Supplement: MOESM8 [file 12711_2024_886_MOESM8_ESM.pdf]

**Additional file 8 Table S5. Candidate variants located in MTRDHH1**

| <b>Position</b> | <b>Ref/Alt</b> | <b>Quality score</b> | <b>Location Annotation</b>         | <b>Functional Consequence<sup>a</sup></b> |
|-----------------|----------------|----------------------|------------------------------------|-------------------------------------------|
| 23,436,234      | G/GTCACA       | 385.8                | Intergenic                         | Modifier                                  |
| 23,436,236      | T/TTTGTG       | 385.8                | Intergenic                         | Modifier                                  |
| 23,776,347      | G/A            | 146.0                | Exonic, <i>MMUT</i><br>(c.1225C>T) | High, stop-gain<br>(p.Gln409*)            |
| 23,969,676      | C/T            | 370.3                | Intergenic                         | Modifier                                  |

<sup>a</sup>Variant annotation and effect predicted by SnpEff [23].

Ref: reference allele

Alt: alternate allele
