# Supplementary material for: Searching for homozygous haplotype deficiency in Manech Tête Rousse dairy sheep revealed a nonsense variant in the MMUT gene affecting newborn lamb viability
Source: Springer Nature journal article supplement (doi:10.1186/s12711-024-00886-7), 2024-02-29
Supplement: MOESM10 [file 12711_2024_886_MOESM10_ESM.pdf]

**Additional file 10: Table S6. *MMUT* SNV genotype distribution from a DNA diversity panel of French and Spanish ovine breeds**

| <b>Breed</b>                   | <b>Total</b> | <b>G/G</b> | <b>A/G</b> | <b>Breed</b>          | <b>Total</b> | <b>G/G</b> | <b>A/G</b> |
|--------------------------------|--------------|------------|------------|-----------------------|--------------|------------|------------|
| Berrichon du Cher (FR)         | 30           | 30         |            | Martinik (FR)         | 23           | 23         |            |
| Blanche du Massif Central (FR) | 31           | 31         |            | Merinos d'Arles (FR)  | 27           | 27         |            |
| Causse du Lot (FR)             | 32           | 32         |            | Mourerous (FR)        | 26           | 26         |            |
| Charmoise (FR)                 | 31           | 31         |            | Mouton Vendéen (FR)   | 30           | 30         |            |
| Charollais (FR)                | 30           | 30         |            | Noir du Velay (FR)    | 28           | 28         |            |
| Corse (FR)                     | 30           | 30         |            | Préalpes du sud (FR)  | 27           | 27         |            |
| Ile de France (FR)             | 28           | 28         |            | Rava (FR)             | 29           | 29         |            |
| Lacaune (Meat) (FR)            | 45           | 45         |            | Romane (FR)           | 30           | 30         |            |
| Lacaune (Milk) (FR)            | 40           | 40         |            | Romanov (FR)          | 26           | 26         |            |
| Latxa Cara Negra Euskadi (ES)  | 30           | 30         |            | Rouge de l'Ouest (FR) | 30           | 30         |            |
| Latxa Cara Negra Navarra (ES)  | 40           | 40         |            | Roussin (FR)          | 30           | 30         |            |
| Latxa Cara Rubia (ES)          | 30           | 29         | 1          | Suffolk (FR)          | 29           | 29         |            |
| Limousine (FR)                 | 30           | 30         |            | Tarasconnaise (FR)    | 33           | 33         |            |
| Manech Tête Rousse (FR)        | 29           | 24         | 5          | Texel (FR)            | 27           | 27         |            |
|                                |              |            |            | <i>Total</i>          | <i>851</i>   | <i>845</i> | <i>6</i>   |

FR: France; ES: Spain
